# Supplementary material
Source: Springer Nature journal article supplement (https://www.springermedizin.de/resource/supplementary/12865_2008_230_MOESM8_ESM.pdf/9427558)

**A**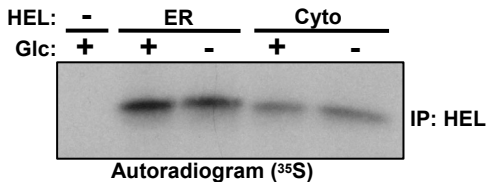**B**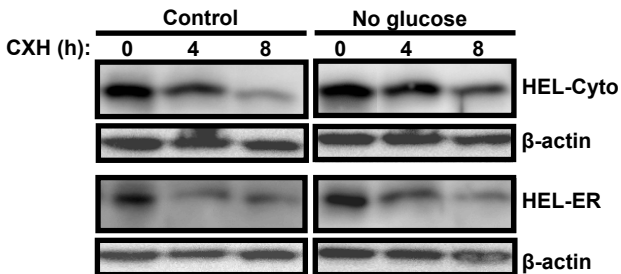**C**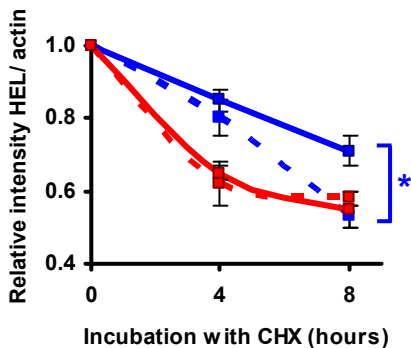

- ..... HEL-Cyto - Control
- HEL-Cyto - No glc
- ..... HEL-ER - Control
- HEL-ER - No glc

Supplement: MOESM8 [file 9427558]
